# Supplementary material for: In vitro toxicological characterisation of arsenic-containing fatty acids and three of their metabolites
Source: PubMed Central journal article supplement (PMC4690163; doi:10.1039/c5tx00122f), 2015-07-03
Supplement: TX-004-C5TX00122F-s001.pdf [file TX-004-C5TX00122F-s001.pdf]

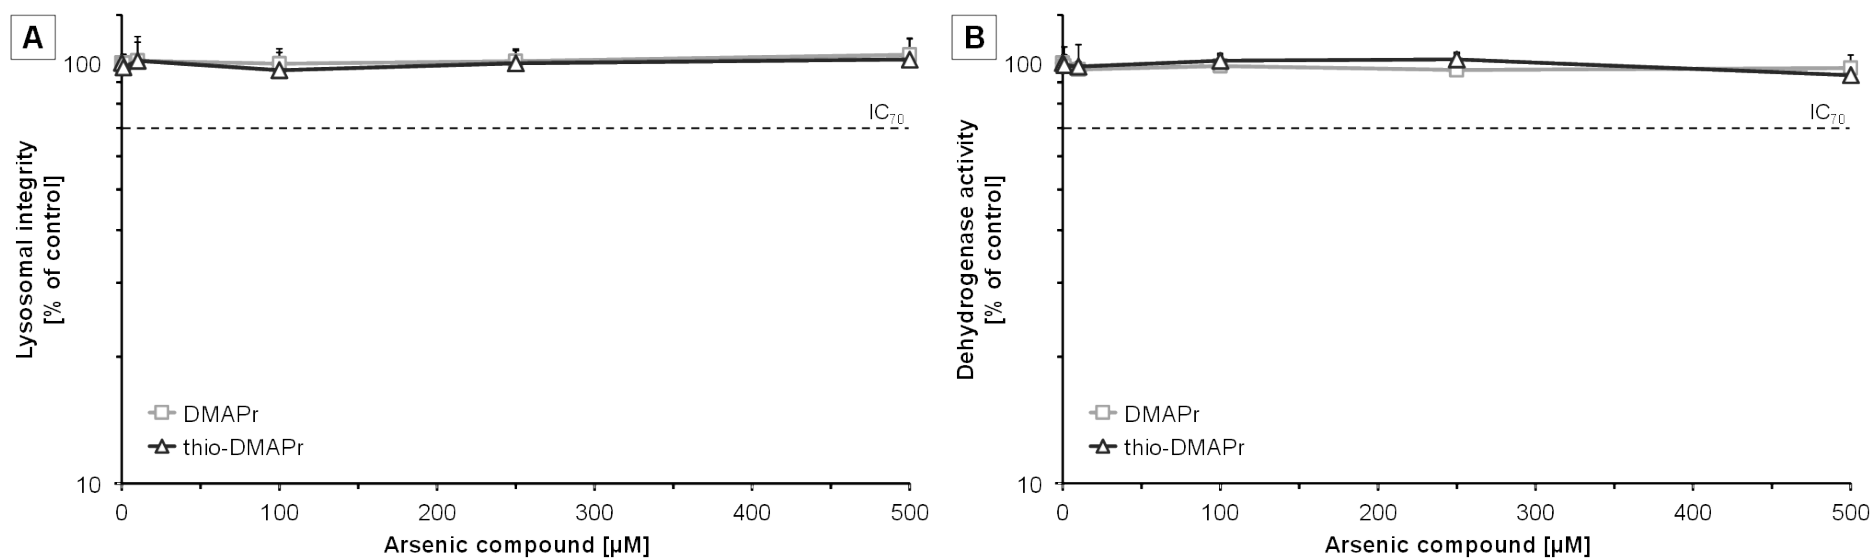

**Figure S1.** Cytotoxicity of DMAPr and thio-DMAPr in UROtsa cells after 48 h of incubation. Cytotoxicity was determined by impact on lysosomal integrity as measured by neutral red uptake (A) and dehydrogenase activity as measured by the CCK-8 assay (B). Shown are mean values of at least three independent determinations +SD normalised to untreated control cells.
